# Supplementary material
Source: HighWire-hosted journal article supplement (https://molpharm.aspetjournals.org/highwire/filestream/76668/field_highwire_adjunct_files/0/MOL43794_Supp_Fig_1.pdf)

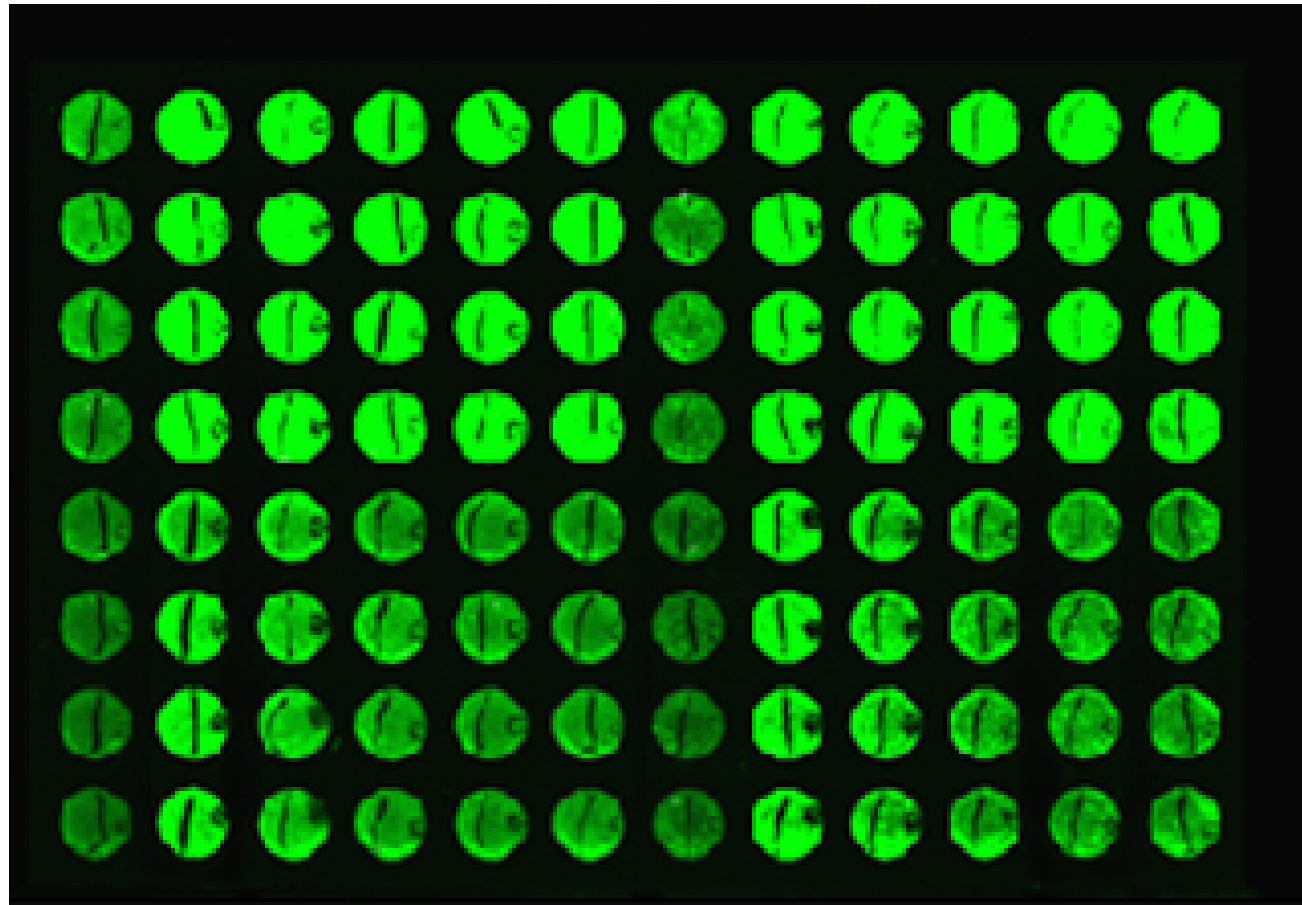

Supplement: MOL43794_Supp_Fig_1.pdf [file MOL43794_Supp_Fig_1.pdf]
